# Supplementary material for: Systematic identification of protein combinations mediating chromatin looping
Source: PubMed Central journal article supplement (PMC4974460; doi:10.1038/ncomms12249), 2016-07-27
Supplement: ncomms12249-s1.pdf [file ncomms12249-s1.pdf]

1

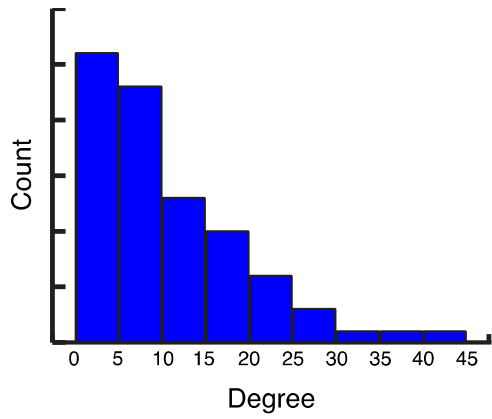

2

3

4

Supplementary Figure 1: Degree distribution of DBP cooperation network in GM12878.

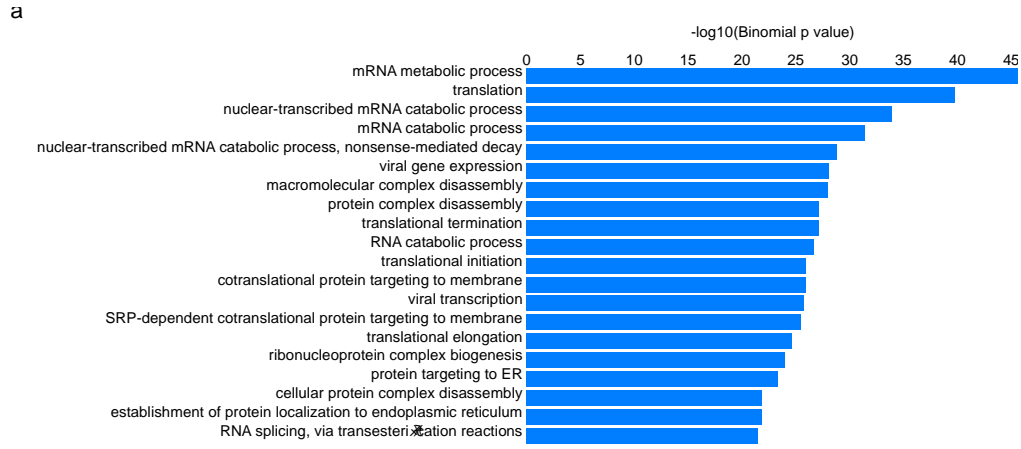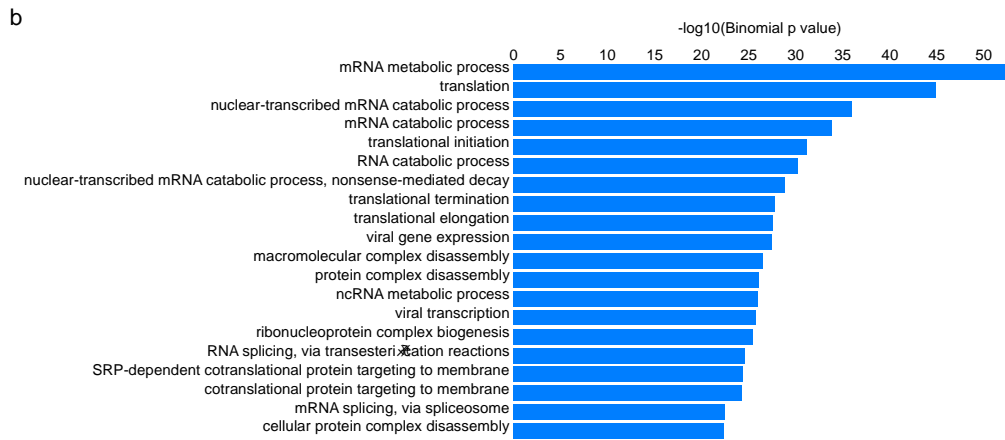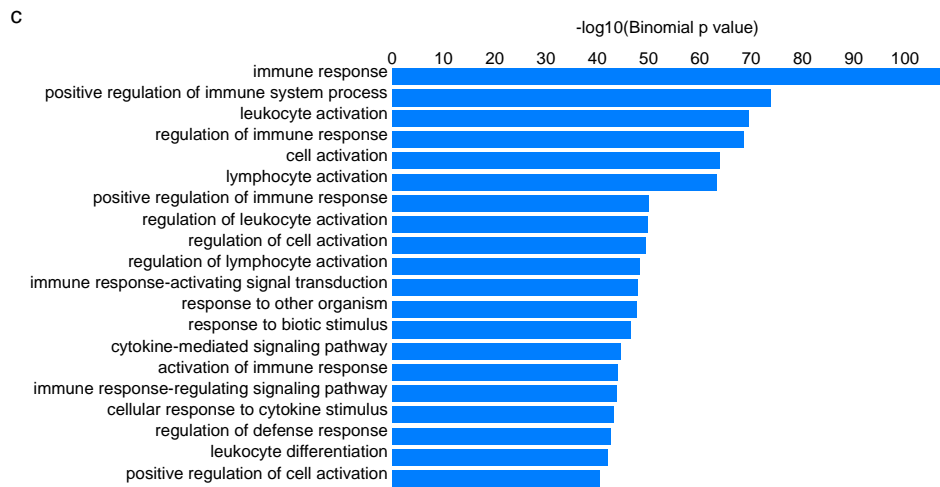

Supplementary Figure 2: Functional analysis of communities in the GM12878 DBP cooperation network. (a) Enriched GO terms in green community. (b) Enriched GO terms in cyan community. (c) Enriched GO terms in red community.

5  
6  
7  
8  
9  
10

11 Supplementary Table 1: Speed comparison of GGM and ARACNE on data sets with different  
 12 sizes.

| Algorithm | Number of nodes | Number of samples | Average running time and standard deviation (second) |
|-----------|-----------------|-------------------|------------------------------------------------------|
| ARACNE    | 50              | 100               | 0.44(0.001)                                          |
|           |                 | 200               | 1.6(0.001)                                           |
|           |                 | 400               | 6.3(0.003)                                           |
|           | 100             | 100               | 1.7(0.002)                                           |
|           |                 | 200               | 6.5(0.005)                                           |
|           |                 | 400               | 25(0.03)                                             |
|           | 200             | 100               | 6.8(0.004)                                           |
|           |                 | 200               | 26(0.005)                                            |
|           |                 | 400               | 102(0.23)                                            |
| GGM       | 50              | 100               | 0.03(0.002)                                          |
|           |                 | 200               | 0.07(0.001)                                          |
|           |                 | 400               | 0.14(0.001)                                          |
|           | 100             | 100               | 0.09(0.002)                                          |
|           |                 | 200               | 0.17(0.001)                                          |
|           |                 | 400               | 0.33(0.002)                                          |
|           | 200             | 100               | 0.34(0.008)                                          |
|           |                 | 200               | 0.49(0.002)                                          |
|           |                 | 400               | 0.89(0.002)                                          |

13

14

15 Supplementary Table 2: Fours communities found in the GM12878 DBP cooperation network.  
 16

| Red community   | Cyan community | Green community | Yellow community |
|-----------------|----------------|-----------------|------------------|
| ATF2            | BCLAF1         | EBF1            | CTCF             |
| BATF            | BHLHE40        | EGR1            | RAD21            |
| BCL11A          | BRCA1          | ELF1            | SMC3             |
| BCL3            | CHD1           | EP300           | YY1              |
| CEBPB           | CHD2           | GABPA           | ZNF143           |
| FOXM1           | CREB1          | H2AFZ           |                  |
| IRF4            | CUX1           | H3K27ac         |                  |
| JUND            | E2F4           | H3K4me1         |                  |
| MEF2A           | ELK1           | H3K4me2         |                  |
| MEF2C           | ESRRA          | H3K4me3         |                  |
| MTA3            | ETS1           | H3K79me2        |                  |
| NFATC1          | MAFK           | H3K9ac          |                  |
| NFIC            | MAX            | IKZF1           |                  |
| PML             | MAZ            | IRF3            |                  |
| POLR2AphosphoS2 | MXI1           | MYC             |                  |
| RELA            | NRF1           | NFYB            |                  |
| RUNX3           | RCOR1          | PAX5            |                  |
| RXRA            | RFX5           | PBX3            |                  |
| SP1             | SIN3A          | POLR2A          |                  |
| STAT5A          | SREBF1         | POLR2AphosphoS5 |                  |
|                 | SREBF2         | POU2F2          |                  |
|                 | STAT1          | REST            |                  |
|                 | STAT3          | SIX5            |                  |
|                 | TBL1XR1        | SPI1            |                  |
|                 | TBP            | SRF             |                  |
|                 | USF2           | TAF1            |                  |
|                 |                | TCF12           |                  |
|                 |                | TCF3            |                  |
|                 |                | USF1            |                  |
|                 |                | WRNIP1          |                  |
|                 |                | ZBTB33          |                  |
|                 |                | ZEB1            |                  |
|                 |                | ZNF384          |                  |

17  
 18  
 19
